# Supplementary material
Source: PubMed Central journal article supplement (PMC4319410)
Supplement: JCI77435sd.pdf [file JCI77435sd.pdf]

## Supplemental Data

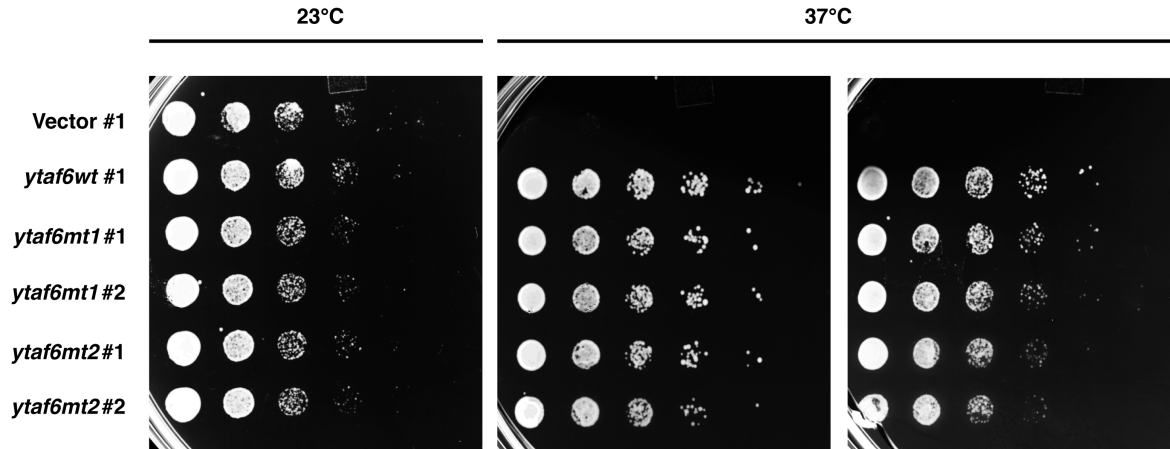

**Supplemental figure 1** – Yeast spot assay of the two *TAF6* mutations identified in CdLS-4 and the Saudi patients. Vector, empty vector used as negative control; *ytaf6wt*, vector with yeast wild type *TAF6* used as positive control; *ytaf6mt1*, vector with yeast *TAF6* mutant corresponds to *hTAF6N<sup>R46C</sup>*; *ytaf6mt2*, vector with yeast *TAF6* mutant corresponds to *hTAF6N<sup>I71T</sup>*. For groups of *ytaf6mt1* and *ytaf6mt2*, two parallel assays (#1 and #2) are performed.

**Supplemental Table 1.** Potential modifier mutation identified in the family of WDSTS-1/2.

| Patient ID               | Zygoty       | Clinical diagnosis | Genomic coordinates | nt change <sup>A</sup> | aa change <sup>B</sup> | Gene         | Conserved | Predicated | Frequencies      |                  |                   |
|--------------------------|--------------|--------------------|---------------------|------------------------|------------------------|--------------|-----------|------------|------------------|------------------|-------------------|
|                          |              |                    |                     |                        |                        |              |           |            | ESP <sup>C</sup> | TGP <sup>D</sup> | ARIC <sup>E</sup> |
| <b>BAB4135 (WDSTS-1)</b> | Homozygous   | WDSTS              | Chr20:<br>58455447  | c.T2852C               | p.I951T                | <i>SYCP2</i> | +         | Damaging   | 0.23%            | 0.05%            | 0.5%              |
| <b>BAB4136 (WDSTS-2)</b> | Heterozygous |                    |                     |                        |                        |              |           |            |                  |                  |                   |

<sup>A</sup> Nucleotide change;

<sup>B</sup> Amino acid change;

<sup>C</sup> Exome Variant Server;

<sup>D</sup> 1000 Genomes project;

<sup>E</sup> Internal control database of ~4000 exomes at Baylor College of Medicine.

**Supplemental Table 2.** The gene targeted on the CdLS aCGH with their names chromosomal and genomic locations (hg18) listed accordingly.

| <b>Name of the Gene</b> | <b>Chromosome</b> | <b>Location (hg18)</b>              |
|-------------------------|-------------------|-------------------------------------|
| <i>PLK3</i>             | chr1              | 45038623-45044254                   |
| <i>SMC6</i>             | chr2              | 17708560-17798577                   |
| <i>NCAPH</i>            | chr2              | <a href="#">96365211-96405001</a>   |
| <i>SGOL2</i>            | chr2              | 201099110-201157063                 |
| <i>SHOX2</i>            | chr3              | 159296494-159306630                 |
| <i>SGOL1</i>            | chr3              | 20177089-20202687                   |
| <i>STAG1</i>            | chr3              | 137538689-137953935                 |
| <i>SMC4</i>             | chr3              | <a href="#">161600124-161635435</a> |
| <i>NLGN1</i>            | chr3              | 174598938-175483810                 |
| <i>NAALADL2</i>         | chr3              | 176059805-177006122                 |
| <i>SOX2</i>             | chr3              | 182912416-182914917                 |
| <i>CHRD</i>             | chr3              | 185580555-185590311                 |
| <i>NCAPG</i>            | chr4              | <a href="#">17421623-17455585</a>   |
| <i>PDS5A</i>            | chr4              | 39500878-39655971                   |
| <i>NIPBL</i>            | chr5              | 36912618-37101678                   |
| <i>PTTG1</i>            | chr5              | 159781443-159788324                 |
| <i>STAG3</i>            | chr7              | 99613474-99649946                   |

|                    |       |                                     |
|--------------------|-------|-------------------------------------|
| <i>NCAPG2</i>      | chr7  | <a href="#">158116764-158190281</a> |
| <i>ESCO2</i>       | chr8  | 27687977-27718343                   |
| <i>RAD21</i>       | chr8  | 117927355-117956286                 |
| <i>SMC5</i>        | chr9  | 72063698-72159609                   |
| <i>SMC2</i>        | chr9  | <a href="#">105896362-105943521</a> |
| <i>WAPAL</i>       | chr10 | 88184993-88271521                   |
| <i>SMC3</i>        | chr10 | 112317439-112354382                 |
| <i>CDCA5</i>       | chr11 | 64601503-64608191                   |
| <i>ATM</i>         | chr11 | 107598769-107745036                 |
| <i>NCAPD3</i>      | chr11 | <a href="#">133527547-133599636</a> |
| <i>ESPL1</i>       | chr12 | 51948350-51973694                   |
| <i>CBX5 (HP1A)</i> | chr12 | <a href="#">52910997-52960182</a>   |
| <i>TIMELESS</i>    | chr12 | <a href="#">55096425-55129467</a>   |
| <i>PDS5B</i>       | chr13 | 32058592-32250157                   |
| <i>REC8</i>        | chr14 | 23711074-23719303                   |
| <i>GSC</i>         | chr14 | 94304313-94306252                   |
| <i>TIPIN</i>       | chr15 | <a href="#">64416062-64436108</a>   |
| <i>PLK1</i>        | chr16 | 23597702-23609189                   |
| <i>CTCF</i>        | chr16 | 66153965-66230589                   |

|                       |       |                                   |
|-----------------------|-------|-----------------------------------|
| <i>AURKB</i>          | chr17 | 8048774-8054608                   |
| <i>ESCO1</i>          | chr18 | 17363260-17434691                 |
| <i>KIAA0892</i>       | chr19 | 19292614-19330564                 |
| <i>KIF3B</i>          | chr20 | 30329128-30386472                 |
| <i>CTCF</i>           | chr20 | <a href="#">55505630-55533560</a> |
| <i>PTTG1IP</i>        | chr21 | 45093941-45118169                 |
| <a href="#">SMC1B</a> | chr22 | 44118609-44188164                 |
| <i>NCAPH2</i>         | chr22 | <a href="#">49293511-49305057</a> |
| <a href="#">SMC1A</a> | chrX  | 53417795-53466343                 |
| <i>STAG2</i>          | chrX  | 122922156-123064186               |

**Supplemental Table 3. The primers for Sanger confirmation and segregation analysis.**

| No. | Families                    | Forward primers |                           | Reverse primers |                            |
|-----|-----------------------------|-----------------|---------------------------|-----------------|----------------------------|
|     |                             | Name            | Sequence (5'-3')          | Name            | Sequence (5'-3')           |
| 1   | BAB3616                     | NIPBL-26F       | TTTTCTGGCTTTCTTAAATCTG    | NIPBL-26R       | GCTCACAAGCATCCAGAATC       |
| 2   | BAB3617                     | NIPBL-10F1      | GAGCTTCAAAGAGTGAAATGAAAC  | NIPBL-10R1      | TCGTTCTGATTTTAACCGAGG      |
| 3   | BAB3621                     | NIPBL-2F        | TTGTGTGTTGCAGTGTTGG       | NIPBL-2R        | TTAAAGGGCAGTTTCAGTTGC      |
| 4   | BAB3623                     | SMC1A-5F        | ACCTCTGGCTCTGAGGGAC       | SMC1A-5R        | ATAAACAGCACGGCCTCTTG       |
| 5   | BAB3967                     | NIPBL-10F2      | CATTGATCTTCATCAGGCAGGA    | NIPBL-10R2      | GGCCTTGATTTTGTGTTTCTG      |
| 6   | BAB4008                     | NIPBL-7F        | TGGAATCTGGCAGAGTGTTAAG    | NIPBL-7R        | TATGTGCAGGAGCCATGTTG       |
| 7   | BAB4037<br>(CdLS-4)         | TAF6-2F         | TCTCCACTGTCCCTCCCTTG      | TAF6-2R         | AGACCTGGCTGAAGGATGG        |
| 8   | BAB4135/4136<br>(WDSTS-1/2) | SMC1A-2F        | TTGATGAGAATGCCCACTTC      | SMC1A-2R        | TGTTGTCCAAGCTGGTTTCA       |
|     |                             | SYCP2-30F       | GACGAAAATCATGAGCCAAGGA    | SYCP2-30R       | TGATCTGGTTTTCCAAGTACTTTC   |
| 9   | BAB4141                     | NIPBL-3F        | TTTGTTAGGAAGAGGAGGAATG    | NIPBL-3R        | TTTCTGAAATAAAACCAGGAATACG  |
| 10  | BAB4695                     | NIPBL-20F       | GAAAACATTTTCATTCTAAATGGC  | NIPBL-20R       | TGACGGTTCAATATAATGGTGG     |
| 11  | BAB4709                     | NIPBL-9F        | CATCTTTCGTAATAAGTAGCTTGG  | NIPBL-9R        | TTGTTCTTGCTGCGACAAAC       |
| 12  | BAB4797                     | NIPBL_46F       | ACCCACACCAAACTACTGCC      | NIPBL_46R       | AAGGATGTATAAACGGGTAAGTAGAG |
| 13  | BAB4938                     | HDAC8_4F        | TCACACCTCAACCTATTCCTCC    | HDAC8_4R        | CACACACGTCTCTGTAAATGTC     |
| 14  | BAB4964<br>(CdLS-3)         | KMT2A_3F        | GCATCTGGTTTTTCTGCATCTG    | KMT2A_3R        | TGAGTCAGGGAATGAGAAGGAA     |
| 15  | BAB5452<br>(CdLS-2)         | SMC1A-22F       | TGTCTCGGACACTTCCAGCTTT    | SMC1A-22R       | CTGGGGGAAGGGCTAGAGATTAGA   |
|     |                             | ABCA4-42F       | CCCAGGGTAAGTGTGTGTGTG     | ABCA4-42R       | GTGCCTGCCATGTCAATATGT      |
| 16  | BAB5593<br>(CdLS-1)         | SMC3-23F        | TCAGTGGTGGTTAGATGCTTAGAAA | SMC3-23R        | TGCTTCTGCCTATTTGGACATT     |
| 17  | BAB6475                     | NIPBL-44F       | GAAGCTTTTTCAAGCTGTTGAATGG | NIPBL-44R       | GCATGCAAACAAAACCTGGGTTTC   |
| 18  | Saudi                       | TAF6-3F         | GCCCAGATTCAGGAGGAGAC      | TAF6-3R         | CATAGAAGTAAAGCTCCCGGC      |

**Supplemental Table 4. The primers for splicing site mutation analysis.**

| Families            | Forward primers |                           | Reverse primers |                            |
|---------------------|-----------------|---------------------------|-----------------|----------------------------|
|                     | Name            | Sequence (5'-3')          | Name            | Sequence (5'-3')           |
| BAB5452<br>(CdLS-2) | 5452- SMC1A-F   | GGTAGCCACAGATTCAAAACAAGCA | 5452- SMC1A-R   | AGTGAGTGGTTCACAGAGAATTTCCA |
| BAB5593<br>(CdLS-1) | 5593-SMC3-F     | ACTGGGAACTGATTTGCTTTCTCAA | 5593-SMC3-R     | GCCGATTTGTCATCTTTTCCAGTTC  |
